# Supplementary material for: Influence of the group 11 metal on the emissive properties of complexes [M{(PR2)2C2B9H10}L]
Source: Royal Society of Chemistry journal article supplement (doi:10.1039/c3dt50434d), 2013-01-01
Supplement: c3dt50434d.pdf [file c3dt50434d.pdf]

## SUPPLEMENTARY INFORMATION

If no other indication is present the spectra correspond to normalized emission and excitation spectra for **3-14**, **16** and **18** in the solid state at room temperature.

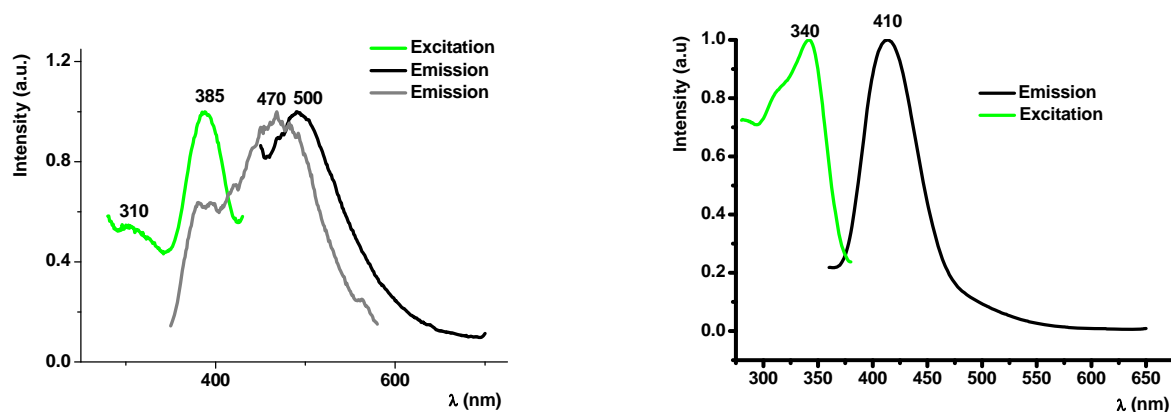

Figure 1. Compound **3** (left). Compound **4** (right)

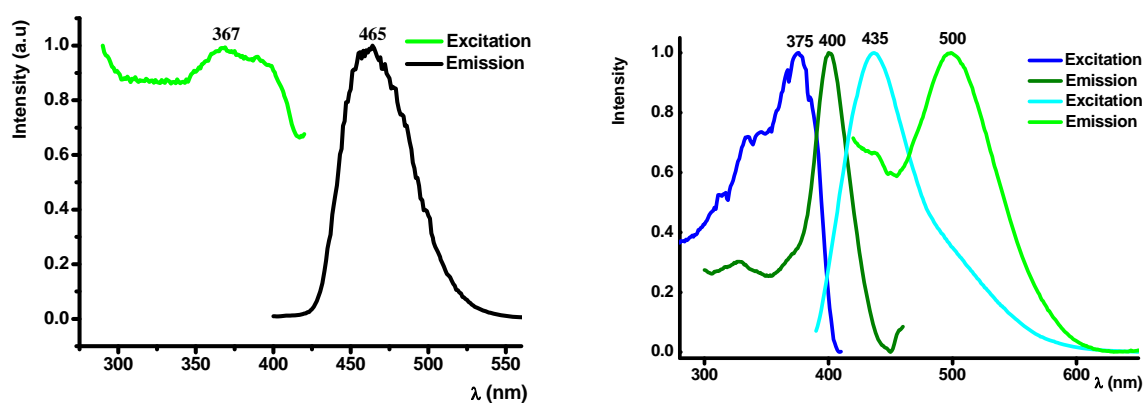

Figure 2. Compound **5** (left). Compound **6** (right). Excitation and emission at higher energy in blue, and at lower energy in green

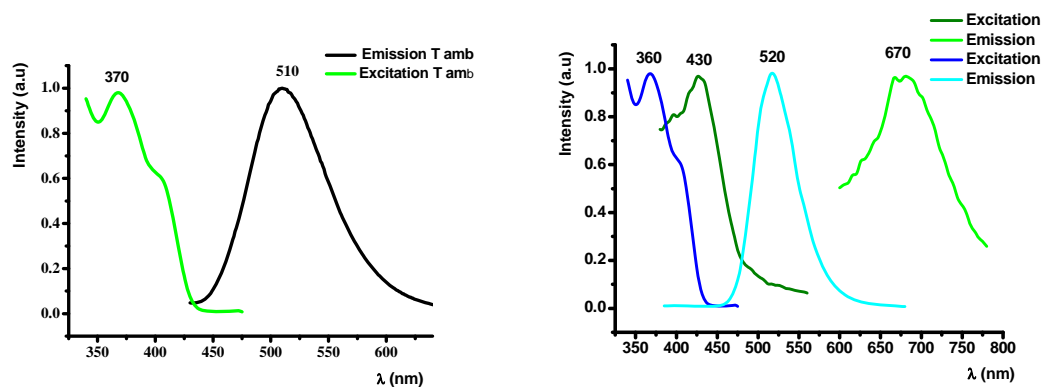

Figure 3. Compound **7** at room temperature (left). Compound **7** at 77 K (right). Excitation and emission at higher energy in blue, and at lower energy in green.

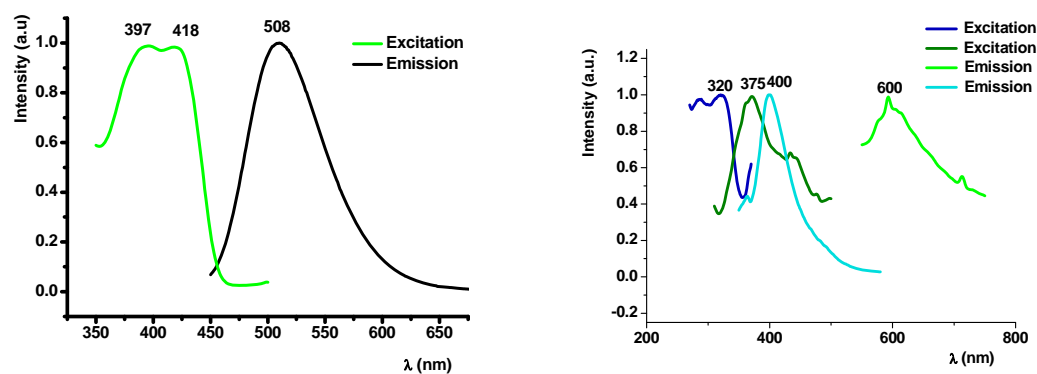

Figure 4. Compound **8** (left). Compound **9** (right). Excitation and emission at higher energy in blue, and at lower energy in green

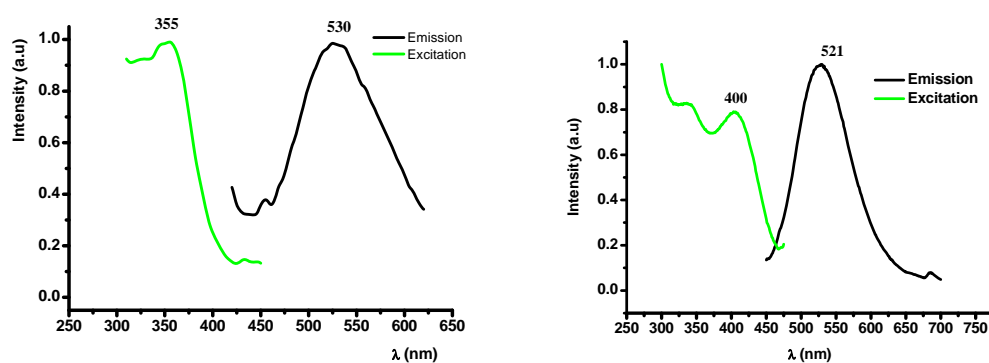

Figure 5. Compound **10** (left). Compound **11** (right)

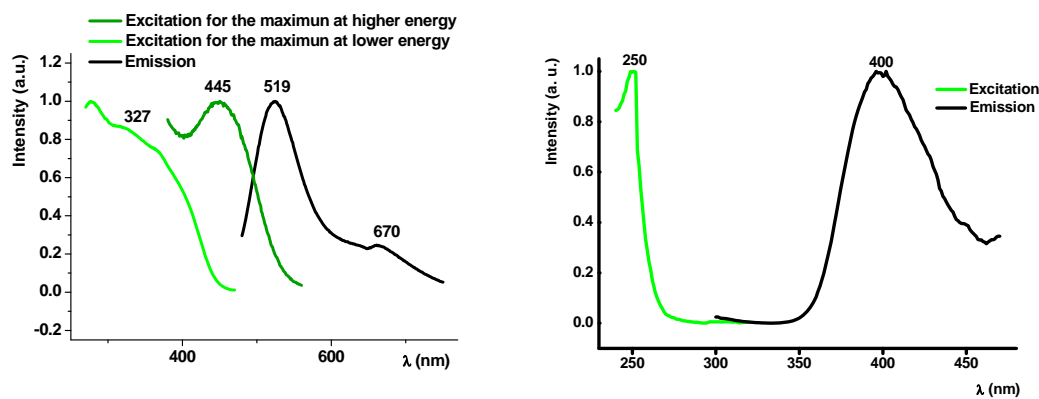

Figure 6. compound **12** (left). Compound **13** (right)

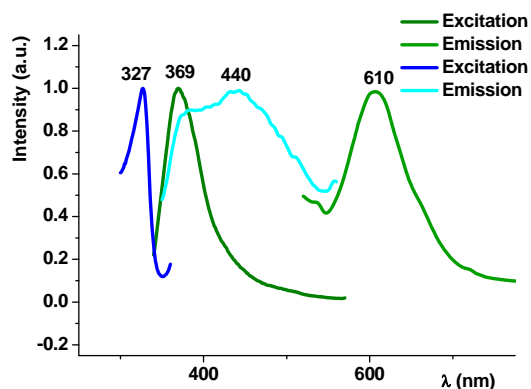

Figure 7. Compound **14**. Excitation and emission at higher energy in blue, and at lower energy in green

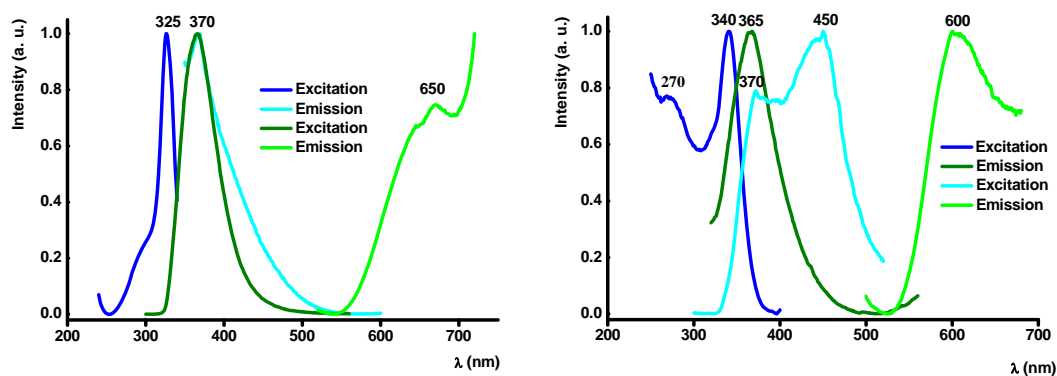

Figure 8. Excitation and emission spectra for complex **14** in dichloromethane solution  $10^{-4}$  M at room temperature (left) and at 77 K (right). Excitation and emission at higher energy in blue, and at lower energy in green

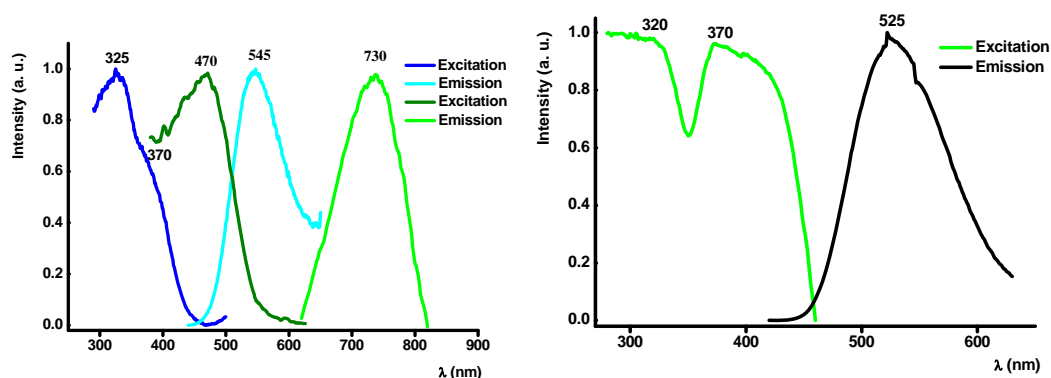

Figure 9. Compound **16** (left). Excitation and emission at higher energy in blue, and at lower energy in green. Compound **18** (right)
